# Supplementary material for: Halogen bonding interactions in ion pairs versus conventional charge-assisted and neutral halogen bonds: a theoretical study based on imidazolium species
Source: Royal Society of Chemistry journal article supplement (doi:10.1039/c5ra13988k), 2015-01-01
Supplement: c5ra13988k1.pdf [file c5ra13988k1.pdf]

## Electronic Supplementary Information

Halogen bonding interactions in ion pairs versus conventional charge-assisted and neutral halogen bonds: a theoretical study based on imidazolium species

Shaozhe Zhang,<sup>a,1</sup> Zhaoqiang Chen,<sup>b,1</sup> Yunxiang Lu,<sup>a,\*</sup> Zhijian Xu,<sup>b</sup> Weihong Wu,<sup>a</sup> Weiliang Zhu,<sup>b</sup> Changjun Peng,<sup>a</sup> and Honglai Liu<sup>a</sup>

<sup>a</sup> *Key Laboratory for Advanced Materials and Department of Chemistry, East China University of Science and Technology, Shanghai 200237, China.*

<sup>b</sup> *Drug Discovery and Design Center, Shanghai Institute of Materia Medica, Chinese Academy of Sciences, Shanghai, 201203, China*

\* *E-mail: yxlu@ecust.edu.cn*

**Table S1.** The CSD search results of 2-halo-imidazolium cations<sup>a</sup>

| Code                                      | Donor | Acceptor | Anion                                                                     | $d(X\cdots Y)$ | Reduction (%) of<br>vdW radii sum | $d\angle(C-X\cdots Y)$ |
|-------------------------------------------|-------|----------|---------------------------------------------------------------------------|----------------|-----------------------------------|------------------------|
| <b>Cl<math>\cdots</math>X<sup>-</sup></b> |       |          |                                                                           |                |                                   |                        |
| HILMEU                                    | Cl    | Cl       | Cl <sup>-</sup>                                                           | 2.798          | 20.1                              | 169.5                  |
| YILJEK                                    | Cl    | Br       | Br <sup>-</sup>                                                           | 3.236          | 10.6                              | 169.4                  |
| <b>Cl<math>\cdots</math>Y</b>             |       |          |                                                                           |                |                                   |                        |
| AXEFOY                                    | Cl    | Cl       | TeCl <sub>6</sub> <sup>2-</sup>                                           | 3.196          | 8.7                               | 161.9                  |
| EHENIO                                    | Cl    | Cl       | Cl <sub>2</sub> O <sub>2</sub> P <sup>-</sup>                             | 2.817          | 19.5                              | 180.0                  |
| KOTDOM                                    | Cl    | Cl       | H <sub>2</sub> Cl <sub>3</sub> CuO <sup>-</sup>                           | 3.409          | 2.6                               | 169.6                  |
| QIVPOB                                    | Cl    | Cl       | SeCl <sub>6</sub> <sup>2-</sup>                                           | 3.171          | 9.4                               | 165.2                  |
| GAWHET                                    | Cl    | O        | C <sub>6</sub> H <sub>6</sub> N <sub>3</sub> O <sub>5</sub> <sup>-</sup>  | 2.881          | 17.7                              | 172.7                  |
| <b>Br<math>\cdots</math>X<sup>-</sup></b> |       |          |                                                                           |                |                                   |                        |
| LAVMEC                                    | Br    | Br       | Br <sup>-</sup>                                                           | 3.299          | 11.8                              | 161.4                  |
| ALOKOC                                    | Br    | Br       | Br <sup>-</sup>                                                           | 3.191          | 14.7                              | 174.2                  |
| ALOKUI                                    | Br    | Br       | Br <sup>-</sup>                                                           | 3.217          | 14.0                              | 166.8                  |
| CIHHAE                                    | Br    | Br       | Br <sup>-</sup>                                                           | 3.032          | 18.9                              | 177.7                  |
| HABNAB                                    | Br    | Br       | Br <sup>-</sup>                                                           | 3.297          | 11.8                              | 172.6                  |
| ICIKEM                                    | Br    | Br       | Br <sup>-</sup>                                                           | 3.283          | 12.2                              | 174.7                  |
| QEGSUS                                    | Br    | Br       | Br <sup>-</sup>                                                           | 3.432          | 8.2                               | 161.2                  |
| QEGTAZ                                    | Br    | Br       | Br <sup>-</sup>                                                           | 3.299          | 11.8                              | 172.6                  |
| VIBPAY                                    | Br    | Br       | Br <sup>-</sup>                                                           | 3.106          | 17.0                              | 172.6                  |
| XEZQOK                                    | Br    | Br       | Br <sup>-</sup>                                                           | 3.158          | 15.6                              | 168.2                  |
| YISQEY                                    | Br    | Br       | Br <sup>-</sup>                                                           | 3.222          | 13.9                              | 175.9                  |
| <b>Br<math>\cdots</math>Y</b>             |       |          |                                                                           |                |                                   |                        |
| ALOLAP                                    | Br    | F        | PF <sub>6</sub> <sup>-</sup>                                              | 3.078          | 5.9                               | 160.6                  |
| CIHHEI                                    | Br    | F        | PF <sub>6</sub> <sup>-</sup>                                              | 3.650          | -11.6                             | 165.3                  |
| CIHHOS                                    | Br    | F        | BF <sub>4</sub> <sup>-</sup>                                              | 2.826          | 13.6                              | 166.1                  |
| CIHHUY                                    | Br    | F        | PF <sub>6</sub> <sup>-</sup>                                              | 3.157          | 3.5                               | 154.9                  |
| CIHJEK                                    | Br    | F        | BF <sub>4</sub> <sup>-</sup>                                              | 2.869          | 12.3                              | 166.1                  |
| VIBNOK                                    | Br    | F        | PF <sub>6</sub> <sup>-</sup>                                              | 2.965          | 9.3                               | 166.8                  |
| YUWZEW                                    | Br    | F        | PF <sub>6</sub> <sup>-</sup>                                              | 3.150          | 3.7                               | 139.2                  |
| YUWZEW01                                  | Br    | F        | PF <sub>6</sub> <sup>-</sup>                                              | 3.286          | -0.5                              | 138.2                  |
| AXEFIS                                    | Br    | Br       | TeBr <sub>6</sub> <sup>2-</sup>                                           | 3.419          | 8.6                               | 161.7                  |
| AYEHOB                                    | Br    | Br       | C <sub>6</sub> H <sub>6</sub> BrO <sub>4</sub> <sup>-</sup>               | 2.872          | 23.2                              | 153.9                  |
| SADYAZ                                    | Br    | N        | C <sub>2</sub> AgN <sub>2</sub> <sup>-</sup>                              | 2.959          | 11.1                              | 177.7                  |
| VIBNUQ                                    | Br    | N        | C <sub>2</sub> F <sub>6</sub> NO <sub>4</sub> S <sub>2</sub> <sup>-</sup> | 2.768          | 16.9                              | 173.8                  |
| FALCIF                                    | Br    | O        | NO <sub>3</sub> <sup>-</sup>                                              | 3.005          | 8.7                               | 159.1                  |
| YILJOU                                    | Br    | O        | NO <sub>3</sub> <sup>-</sup>                                              | 2.724          | 17.2                              | 175.8                  |

| <b>I...X<sup>-</sup></b> |   |    |                                              |       |      |       |
|--------------------------|---|----|----------------------------------------------|-------|------|-------|
| KAQSOM                   | I | Cl | Cl <sup>-</sup>                              | 3.023 | 20.2 | 174.1 |
| VIBPEC                   | I | Cl | Cl <sup>-</sup>                              | 3.041 | 19.8 | 176.6 |
| VIBPEC01                 | I | Cl | Cl <sup>-</sup>                              | 2.965 | 21.8 | 179.1 |
| XEZRAX                   | I | Cl | Cl <sup>-</sup>                              | 2.948 | 22.2 | 177.6 |
| KAQSIG                   | I | Br | Br <sup>-</sup>                              | 3.099 | 20.7 | 178.5 |
| NEDPAP                   | I | Br | Br <sup>-</sup>                              | 3.121 | 20.2 | 172.0 |
| PETTOZ                   | I | Br | Br <sup>-</sup>                              | 3.047 | 22.1 | 178.0 |
| PETTUF                   | I | Br | Br <sup>-</sup>                              | 3.079 | 21.3 | 176.7 |
| PETVAN                   | I | Br | Br <sup>-</sup>                              | 3.041 | 22.2 | 176.6 |
| WEBFEQ                   | I | Br | Br <sup>-</sup>                              | 3.095 | 20.8 | 167.5 |
| WEBFIU                   | I | Br | Br <sup>-</sup>                              | 3.303 | 15.5 | 167.9 |
| YILJIO                   | I | Br | Br <sup>-</sup>                              | 3.114 | 20.4 | 174.7 |
| ICIKOW                   | I | I  | I <sup>-</sup>                               | 3.357 | 17.7 | 176.3 |
| ICIKUC                   | I | I  | I <sup>-</sup>                               | 3.306 | 19.0 | 179.0 |
| KAQSEC                   | I | I  | I <sup>-</sup>                               | 3.283 | 19.5 | 172.1 |
| KOFPUS                   | I | I  | I <sup>-</sup>                               | 3.263 | 20.0 | 178.1 |
| LOFFUJ                   | I | I  | I <sup>-</sup>                               | 3.373 | 17.3 | 169.4 |
| XEZREB                   | I | I  | I <sup>-</sup>                               | 3.288 | 19.4 | 177.6 |
| <b>I...Y</b>             |   |    |                                              |       |      |       |
| WEBFAM                   | I | F  | PF <sub>6</sub> <sup>-</sup>                 | 3.045 | 11.5 | 149.4 |
| GAZQIH                   | I | Br | Br <sub>2</sub> I <sup>-</sup>               | 3.287 | 15.9 | 163.2 |
| FAJCID                   | I | I  | I <sub>3</sub> <sup>-</sup>                  | 3.368 | 17.5 | 177.9 |
| KAQSUS                   | I | O  | H <sub>2</sub> O <sub>4</sub> P <sup>-</sup> | 2.602 | 24.8 | 177.8 |
| ITUPAP                   | I | S  | CF <sub>3</sub> SO <sub>3</sub> <sup>-</sup> | 2.838 | 26.1 | 168.7 |

<sup>a</sup> Distances are given in angstroms, and angles in degrees.

**Table S2.** The CSD search results of 4-halo-/5-halo-imidazolium cations<sup>a</sup>

| Code                      | Donor | Acceptor | Anion                           | $d(X...Y)$ | Reduction (%) of<br>vdW radii sum | $d\angle(C-X...Y)$ |
|---------------------------|-------|----------|---------------------------------|------------|-----------------------------------|--------------------|
| <b>Cl...X<sup>-</sup></b> |       |          |                                 |            |                                   |                    |
| EJEMAI                    | Cl    | Br       | Br <sup>-</sup>                 | 3.042      | 16.0                              | 177.2              |
| PELLID                    | Cl    | I        | I <sup>-</sup>                  | 3.562      | 6.0                               | 174.2              |
| WOMYED                    | Cl    | I        | I <sup>-</sup>                  | 3.590      | 5.3                               | 168.5              |
| <b>Cl...Y</b>             |       |          |                                 |            |                                   |                    |
| CUPPEJ                    | Cl    | Cl       | PdCl <sub>4</sub> <sup>2-</sup> | 3.283      | 6.2                               | 172.7              |
| FUDFUG                    | Cl    | Cl       | SbCl <sub>6</sub> <sup>2-</sup> | 3.294      | 5.9                               | 161.8              |
| <b>Br...X<sup>-</sup></b> |       |          |                                 |            |                                   |                    |

|                          |    |    |                                                                           |       |      |       |
|--------------------------|----|----|---------------------------------------------------------------------------|-------|------|-------|
| CIHHAЕ                   | Br | Br | Br <sup>-</sup>                                                           | 3.201 | 14.4 | 176.6 |
| FEXYIS                   | Br | Br | Br <sup>-</sup>                                                           | 3.210 | 14.2 | 177.6 |
| FEXZEP                   | Br | Br | Br <sup>-</sup>                                                           | 3.288 | 12.1 | 169.2 |
| FEXZIT                   | Br | Br | Br <sup>-</sup>                                                           | 3.283 | 12.2 | 169.5 |
| HABNEF                   | Br | Br | Br <sup>-</sup>                                                           | 3.189 | 14.7 | 175.3 |
| QEGTAZ                   | Br | Br | Br <sup>-</sup>                                                           | 3.458 | 7.5  | 171.6 |
| QEGTED                   | Br | Br | Br <sup>-</sup>                                                           | 3.398 | 9.1  | 165.9 |
| YOXVUD                   | Br | Br | Br <sup>-</sup>                                                           | 3.333 | 10.9 | 173.2 |
| YOXWAK                   | Br | Br | Br <sup>-</sup>                                                           | 3.209 | 14.2 | 174.7 |
| ZAPSIU                   | Br | Br | Br <sup>-</sup>                                                           | 3.321 | 11.2 | 177.8 |
| VUSNIH                   | Br | I  | I <sup>-</sup>                                                            | 3.559 | 9.0  | 175.6 |
| <b>Br...Y</b>            |    |    |                                                                           |       |      |       |
| CIHHEI                   | Br | F  | PF <sub>6</sub> <sup>-</sup>                                              | 3.017 | 7.7  | 173.6 |
| CIHHOS                   | Br | F  | BF <sub>4</sub> <sup>-</sup>                                              | 2.822 | 13.7 | 167.8 |
| CIHHUY                   | Br | F  | PF <sub>6</sub> <sup>-</sup>                                              | 3.255 | 0.5  | 171.0 |
| CIHJEK                   | Br | F  | BF <sub>4</sub> <sup>-</sup>                                              | 2.906 | 11.1 | 179.5 |
| CIHJIO                   | Br | F  | PF <sub>6</sub> <sup>-</sup>                                              | 2.927 | 10.5 | 161.5 |
| HEKJOW                   | Br | Cl | PdCl <sub>4</sub> <sup>2-</sup>                                           | 3.475 | 4.0  | 156.9 |
| AGOCOQ                   | Br | N  | C <sub>2</sub> F <sub>6</sub> NO <sub>4</sub> S <sub>2</sub> <sup>-</sup> | 3.003 | 9.8  | 168.1 |
| CIHHIM                   | Br | N  | C <sub>2</sub> F <sub>6</sub> NO <sub>4</sub> S <sub>2</sub> <sup>-</sup> | 3.612 | -8.5 | 170.1 |
| VURKUP                   | Br | S  | CF <sub>3</sub> SO <sub>3</sub> <sup>-</sup>                              | 2.994 | 18.4 | 165.7 |
| <b>I...X<sup>-</sup></b> |    |    |                                                                           |       |      |       |
| FEXYOY                   | I  | Br | Br <sup>-</sup>                                                           | 3.219 | 17.7 | 176.6 |
| YICJUR                   | I  | I  | I <sup>-</sup>                                                            | 3.541 | 13.2 | 177.6 |
| <b>I...Y</b>             |    |    |                                                                           |       |      |       |
| PUZZIU                   | I  | F  | PF <sub>6</sub> <sup>-</sup>                                              | 3.062 | 11.0 | 174.9 |
| AGOCIK                   | I  | N  | C <sub>2</sub> F <sub>6</sub> NO <sub>4</sub> S <sub>2</sub> <sup>-</sup> | 3.127 | 10.7 | 167.4 |
| VURLAW                   | I  | S  | CF <sub>3</sub> SO <sub>3</sub> <sup>-</sup>                              | 2.866 | 25.4 | 174.3 |

<sup>a</sup> Distances are given in angstroms, and angles in degrees.

**Table S3.** Geometric and energetic data calculated with B3LYP for all the studied systems<sup>a</sup>

|                         | $\Delta E$ | $d(X\cdots X)$ | Reduction (%) of<br>vdw radii sum | $\angle(C-X\cdots X)$ |
|-------------------------|------------|----------------|-----------------------------------|-----------------------|
| Ion-pair complexes      |            |                |                                   |                       |
| <b>1-Cl<sup>-</sup></b> | -76.7      | 2.618          | 25.2                              | 179.1                 |
| <b>2-Br<sup>-</sup></b> | -82.6      | 2.713          | 27.5                              | 180.0                 |
| <b>3-I<sup>-</sup></b>  | -89.9      | 2.966          | 27.3                              | 179.9                 |
| <b>4-Cl<sup>-</sup></b> | -69.2      | 2.652          | 24.2                              | 175.0                 |
| <b>5-Br<sup>-</sup></b> | -74.6      | 2.741          | 26.7                              | 177.8                 |

|                           |       |       |      |       |
|---------------------------|-------|-------|------|-------|
| <b>6-I<sup>-</sup></b>    | -80.5 | 3.008 | 26.3 | 179.0 |
| Charge-assisted complexes |       |       |      |       |
| <b>1-HCl</b>              | -0.4  | 3.455 | 1.3  | 171.7 |
| <b>2-HBr</b>              | -2.2  | 3.519 | 5.9  | 175.9 |
| <b>3-HI</b>               | -3.8  | 3.633 | 11.0 | 177.8 |
| <b>4-HCl</b>              | -1.5  | 3.513 | -0.4 | 170.0 |
| <b>5-HBr</b>              | -1.7  | 3.576 | 4.4  | 172.5 |
| <b>6-HI</b>               | -2.8  | 3.704 | 9.2  | 179.0 |
| <b>7-Cl<sup>-</sup></b>   | ---   | ---   | ---  | ---   |
| <b>8-Br<sup>-</sup></b>   | -6.6  | 3.227 | 13.7 | 173.1 |
| <b>9-I<sup>-</sup></b>    | -10.5 | 3.409 | 16.4 | 177.2 |
| <b>10-Cl<sup>-</sup></b>  | ---   | ---   | ---  | ---   |
| <b>11-Br<sup>-</sup></b>  | -10.3 | 3.143 | 16.0 | 173.5 |
| <b>12-I<sup>-</sup></b>   | -14.6 | 3.33  | 18.4 | 176.9 |
| Neutral complexes         |       |       |      |       |
| <b>7-HCl</b>              | ---   | ---   | ---  | ---   |
| <b>8-HBr</b>              | ---   | ---   | ---  | ---   |
| <b>9-HI</b>               | -0.3  | 4.188 | -2.6 | 179.6 |
| <b>10-HCl</b>             | ---   | ---   | ---  | ---   |
| <b>11-HBr</b>             | ---   | ---   | ---  | ---   |
| <b>12-HI</b>              | ---   | ---   | ---  | ---   |

<sup>a</sup> Energies are given in kcal/mol, distances in angstroms, and angles in degrees. The complexes **7-Cl<sup>-</sup>** and **10-Cl<sup>-</sup>**, together with almost all the neutral complexes, cannot be obtained at the level of B3LYP/aug-cc-pVDZ(-PP).

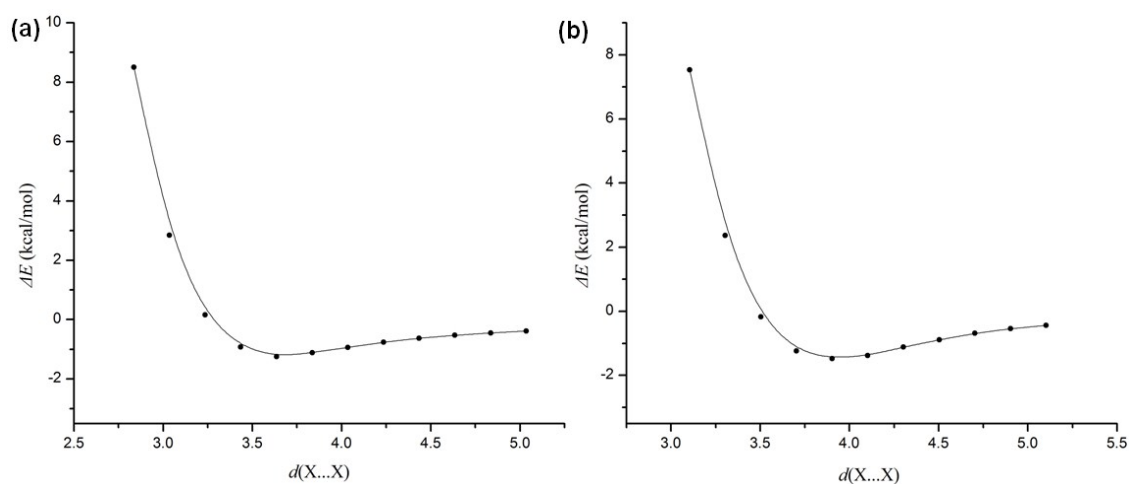

**Fig. S1** Plot of the interaction energy versus the intermolecular X...X distance (a) for **8-HBr** and (b) for **9-HI**.

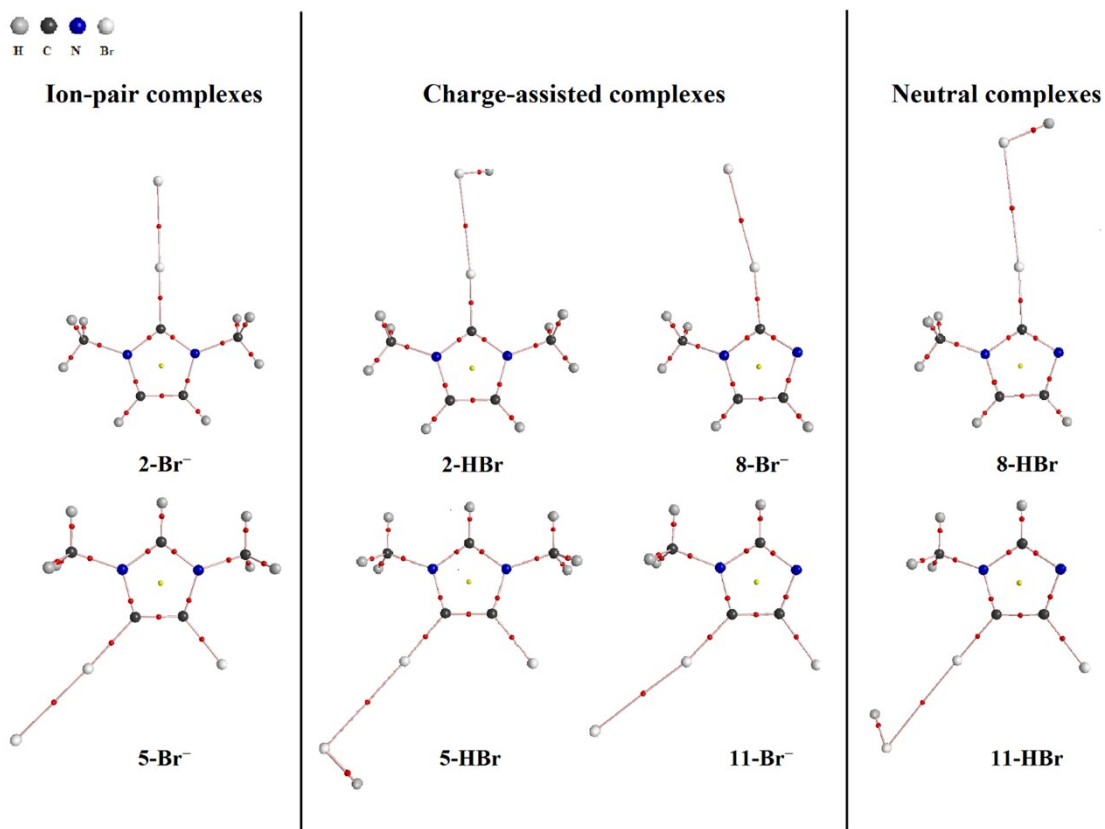

**Fig. S2** Molecular graphs of eight brominated complexes.

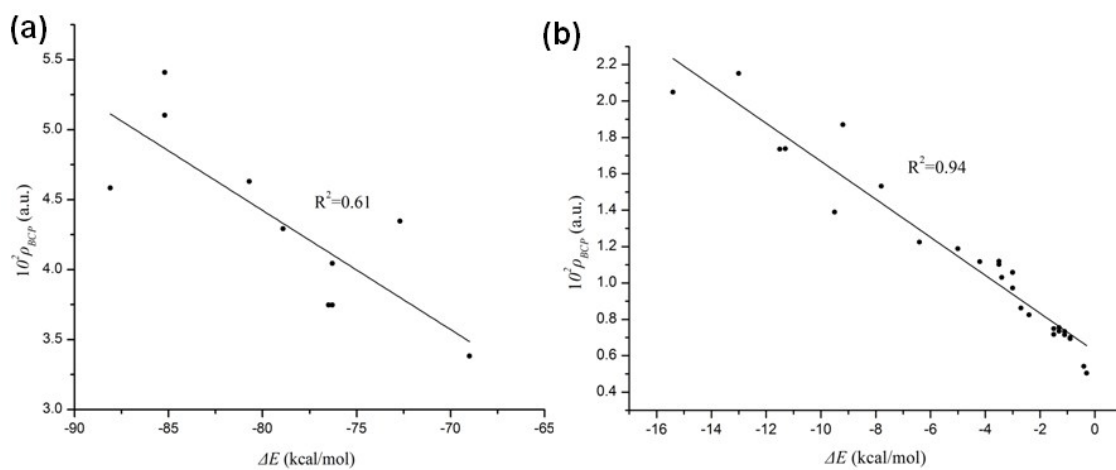

**Fig. S3** Correlation between the interaction energies and the values of  $\rho_{BCP}$  (a) for ion-pair complexes and (b) for charge-assisted and neutral systems.

Cartesian coordinates of the optimized structures for all the studied complexes with the M06-2X/aug-cc-pvDZ(-PP) method:

### Ion-pair complexes

#### 1-Cl<sup>-</sup>

| Center Number | Atomic Number | Coordinates (Angstroms) |           |           |
|---------------|---------------|-------------------------|-----------|-----------|
|               |               | X                       | Y         | Z         |
| 1             | 6             | 2.394260                | 0.684019  | -0.101070 |
| 2             | 6             | 2.392534                | -0.676244 | -0.106629 |
| 3             | 6             | 0.287889                | 0.006012  | 0.028686  |
| 4             | 7             | 1.076201                | 1.089242  | -0.016071 |
| 5             | 1             | 3.211062                | 1.391467  | -0.149628 |
| 6             | 1             | 3.207481                | -1.385400 | -0.161105 |
| 7             | 7             | 1.073383                | -1.078819 | -0.024906 |
| 8             | 6             | 0.573617                | 2.460796  | 0.022378  |
| 9             | 1             | -0.057545               | 2.642901  | -0.852618 |
| 10            | 1             | -0.019602               | 2.602889  | 0.930496  |
| 11            | 1             | 1.431909                | 3.135495  | 0.018994  |
| 12            | 6             | 0.567412                | -2.449359 | 0.001434  |
| 13            | 1             | 1.424066                | -3.126124 | -0.005395 |
| 14            | 1             | -0.028126               | -2.597356 | 0.907081  |
| 15            | 1             | -0.062133               | -2.622930 | -0.876481 |
| 16            | 17            | -1.425918               | 0.009298  | 0.167750  |
| 17            | 17            | -4.061475               | 0.023598  | 0.469992  |

#### 2-Cl<sup>-</sup>

| Center Number | Atomic Number | Coordinates (Angstroms) |           |           |
|---------------|---------------|-------------------------|-----------|-----------|
|               |               | X                       | Y         | Z         |
| 1             | 6             | 2.385590                | 0.683067  | -0.112150 |
| 2             | 6             | 2.389774                | -0.677014 | -0.118063 |
| 3             | 6             | 0.272080                | -0.004233 | 0.047908  |
| 4             | 7             | 1.065821                | 1.077504  | -0.008560 |
| 5             | 1             | 3.198299                | 1.394487  | -0.172717 |

|    |    |           |           |           |
|----|----|-----------|-----------|-----------|
| 6  | 1  | 3.206752  | -1.382966 | -0.184619 |
| 7  | 7  | 1.072490  | -1.080444 | -0.018082 |
| 8  | 6  | 0.571247  | 2.450188  | 0.035783  |
| 9  | 1  | -0.091289 | 2.627599  | -0.816571 |
| 10 | 1  | 0.012443  | 2.605151  | 0.963373  |
| 11 | 1  | 1.430088  | 3.123599  | -0.005531 |
| 12 | 6  | 0.586407  | -2.456541 | 0.013266  |
| 13 | 1  | 1.449653  | -3.124195 | -0.029804 |
| 14 | 1  | 0.024836  | -2.622467 | 0.937285  |
| 15 | 1  | -0.071537 | -2.631404 | -0.843195 |
| 16 | 35 | -1.671080 | -0.011216 | 0.211151  |
| 17 | 17 | -4.224407 | -0.021885 | 0.441447  |

---

## 2-Br<sup>-</sup>

| Center<br>Number | Atomic<br>Number | Coordinates (Angstroms) |           |           |
|------------------|------------------|-------------------------|-----------|-----------|
|                  |                  | X                       | Y         | Z         |
| 1                | 6                | 2.392765                | 0.684982  | -0.128733 |
| 2                | 6                | 2.401569                | -0.675230 | -0.134789 |
| 3                | 6                | 0.286302                | -0.009716 | 0.063042  |
| 4                | 7                | 1.073487                | 1.075250  | -0.005312 |
| 5                | 1                | 3.201849                | 1.399407  | -0.201578 |
| 6                | 1                | 3.219746                | -1.378554 | -0.213483 |
| 7                | 7                | 1.087508                | -1.083621 | -0.014971 |
| 8                | 6                | 0.574318                | 2.446426  | 0.045734  |
| 9                | 1                | -0.100893               | 2.621061  | -0.797181 |
| 10               | 1                | 0.028906                | 2.599583  | 0.981530  |
| 11               | 1                | 1.430156                | 3.122706  | -0.008153 |
| 12               | 6                | 0.606263                | -2.461649 | 0.022713  |
| 13               | 1                | 1.471319                | -3.126128 | -0.031055 |
| 14               | 1                | 0.057519                | -2.629224 | 0.954092  |
| 15               | 1                | -0.061584               | -2.638923 | -0.825539 |
| 16               | 35               | -1.653965               | -0.022141 | 0.247527  |
| 17               | 35               | -4.372190               | -0.036356 | 0.513336  |



2-I<sup>-</sup>

| Center<br>Number | Atomic<br>Number | Coordinates (Angstroms) |           |           |
|------------------|------------------|-------------------------|-----------|-----------|
|                  |                  | X                       | Y         | Z         |
| 1                | 6                | 3.452916                | 0.856547  | -0.117159 |
| 2                | 6                | 3.455564                | -0.503820 | -0.122624 |
| 3                | 6                | 1.342819                | 0.171496  | 0.055362  |
| 4                | 7                | 2.134242                | 1.252824  | -0.005815 |
| 5                | 1                | 4.266041                | 1.567176  | -0.182703 |
| 6                | 1                | 4.271411                | -1.210761 | -0.193793 |
| 7                | 7                | 2.138452                | -0.906148 | -0.014657 |
| 8                | 6                | 1.640953                | 2.626698  | 0.040955  |
| 9                | 1                | 0.975643                | 2.805072  | -0.808994 |
| 10               | 1                | 1.087054                | 2.782021  | 0.971384  |
| 11               | 1                | 2.500575                | 3.298775  | -0.003798 |
| 12               | 6                | 1.650666                | -2.282334 | 0.019706  |
| 13               | 1                | 2.513316                | -2.950516 | -0.025085 |
| 14               | 1                | 1.092479                | -2.446569 | 0.946038  |
| 15               | 1                | 0.990684                | -2.457605 | -0.835077 |
| 16               | 35               | -0.611863               | 0.167910  | 0.233098  |
| 17               | 53               | -3.529538               | 0.163771  | 0.519346  |

### 3-I<sup>-</sup>

---

| Center<br>Number | Atomic<br>Number | Coordinates (Angstroms) |           |           |
|------------------|------------------|-------------------------|-----------|-----------|
|                  |                  | X                       | Y         | Z         |
| 1                | 6                | -0.793740               | -2.457814 | 0.045975  |
| 2                | 6                | 0.565726                | -2.425152 | 0.058147  |
| 3                | 6                | -0.164856               | -0.308615 | -0.007792 |
| 4                | 7                | -1.219168               | -1.144878 | 0.005421  |
| 5                | 1                | -1.482683               | -3.291753 | 0.064617  |
| 6                | 1                | 1.293602                | -3.225114 | 0.089629  |
| 7                | 7                | 0.928506                | -1.092992 | 0.025906  |
| 8                | 6                | 2.295301                | -0.582492 | 0.009104  |
| 9                | 1                | 2.979014                | -1.423099 | 0.149005  |
| 10               | 1                | 2.494207                | -0.092206 | -0.948939 |
| 11               | 1                | 2.422103                | 0.143227  | 0.817390  |
| 12               | 6                | -2.608613               | -0.700132 | -0.021133 |
| 13               | 1                | -2.805515               | -0.061347 | 0.844968  |
| 14               | 1                | -2.794164               | -0.131770 | -0.937490 |
| 15               | 1                | -3.252815               | -1.581942 | 0.009008  |
| 16               | 53               | -0.219196               | 1.953537  | -0.067497 |
| 17               | 53               | -0.284251               | 4.906524  | -0.138428 |

---

### 4-Cl<sup>-</sup>

---

| Center | Atomic | Coordinates (Angstroms) |  |  |
|--------|--------|-------------------------|--|--|
|--------|--------|-------------------------|--|--|

---

| Number | Number | X         | Y         | Z         |
|--------|--------|-----------|-----------|-----------|
| 1      | 6      | -0.910868 | -0.932126 | 0.160624  |
| 2      | 6      | 0.460442  | -0.907771 | 0.173107  |
| 3      | 6      | -0.227602 | 1.180434  | 0.099568  |
| 4      | 7      | -1.303809 | 0.392978  | 0.114623  |
| 5      | 7      | 0.864392  | 0.412860  | 0.134338  |
| 6      | 6      | 2.247730  | 0.875273  | 0.134733  |
| 7      | 1      | 2.737745  | 0.546925  | 1.056214  |
| 8      | 1      | 2.767461  | 0.452646  | -0.730174 |
| 9      | 1      | 2.245878  | 1.965969  | 0.077007  |
| 10     | 6      | -2.703046 | 0.820961  | 0.091344  |
| 11     | 1      | -3.201970 | 0.442418  | 0.988166  |
| 12     | 1      | -2.728531 | 1.912644  | 0.061041  |
| 13     | 1      | -3.188459 | 0.393548  | -0.790767 |
| 14     | 1      | -0.231940 | 2.262044  | 0.064699  |
| 15     | 17     | -2.067941 | -2.204615 | 0.189787  |
| 16     | 17     | 1.568641  | -2.192996 | 0.234401  |
| 17     | 17     | -4.084052 | -3.996238 | 0.216997  |

### 5-Cl<sup>-</sup>

| Center<br>Number | Atomic<br>Number | Coordinates (Angstroms) |           |           |
|------------------|------------------|-------------------------|-----------|-----------|
|                  |                  | X                       | Y         | Z         |
| 1                | 6                | -0.987141               | -0.904931 | 0.093945  |
| 2                | 6                | 0.383314                | -0.851522 | 0.065286  |
| 3                | 6                | -0.332977               | 1.221919  | -0.053252 |
| 4                | 7                | -1.393650               | 0.415982  | 0.018238  |
| 5                | 7                | 0.771908                | 0.473061  | -0.026802 |
| 6                | 6                | 2.142114                | 0.965847  | -0.091168 |
| 7                | 1                | 2.680199                | 0.658865  | 0.810508  |

|    |    |           |           |           |
|----|----|-----------|-----------|-----------|
| 8  | 1  | 2.635280  | 0.545998  | -0.973130 |
| 9  | 1  | 2.113646  | 2.055865  | -0.159358 |
| 10 | 6  | -2.792179 | 0.840425  | 0.023282  |
| 11 | 1  | -3.263869 | 0.488105  | 0.945025  |
| 12 | 1  | -2.824471 | 1.931100  | -0.037609 |
| 13 | 1  | -3.302847 | 0.387649  | -0.831289 |
| 14 | 1  | -0.355372 | 2.301908  | -0.121658 |
| 15 | 35 | -2.262722 | -2.372388 | 0.202303  |
| 16 | 35 | 1.607210  | -2.238756 | 0.146228  |
| 17 | 17 | -4.049294 | -4.245809 | 0.327365  |

---

### 5-Br<sup>-</sup>

| Center<br>Number | Atomic<br>Number | Coordinates (Angstroms) |           |           |
|------------------|------------------|-------------------------|-----------|-----------|
|                  |                  | X                       | Y         | Z         |
| 1                | 6                | -1.002663               | -0.904595 | 0.046064  |
| 2                | 6                | 0.367892                | -0.861709 | 0.030499  |
| 3                | 6                | -0.334738               | 1.218892  | -0.043405 |
| 4                | 7                | -1.401724               | 0.419211  | -0.001064 |
| 5                | 7                | 0.765029                | 0.462121  | -0.025575 |
| 6                | 6                | 2.139497                | 0.946910  | -0.061430 |
| 7                | 1                | 2.661841                | 0.620637  | 0.842841  |
| 8                | 1                | 2.642422                | 0.538813  | -0.943310 |
| 9                | 1                | 2.119010                | 2.038068  | -0.111126 |
| 10               | 6                | -2.798049               | 0.852258  | 0.001212  |
| 11               | 1                | -3.279209               | 0.486369  | 0.912758  |
| 12               | 1                | -2.822827               | 1.943978  | -0.040044 |
| 13               | 1                | -3.304231               | 0.418785  | -0.866015 |
| 14               | 1                | -0.349420               | 2.300385  | -0.085436 |
| 15               | 35               | -2.284755               | -2.364435 | 0.121021  |
| 16               | 35               | 1.579589                | -2.260194 | 0.082197  |

17

35

-4.207301

-4.345083

0.232614

---

**5-I<sup>-</sup>**

---

| Center<br>Number | Atomic<br>Number | Coordinates (Angstroms) |           |           |
|------------------|------------------|-------------------------|-----------|-----------|
|                  |                  | X                       | Y         | Z         |
| 1                | 6                | -0.981210               | -0.901440 | 0.065741  |
| 2                | 6                | 0.388147                | -0.850227 | 0.042529  |
| 3                | 6                | -0.330825               | 1.224266  | -0.049572 |
| 4                | 7                | -1.391707               | 0.417384  | 0.006859  |
| 5                | 7                | 0.774869                | 0.476039  | -0.029612 |
| 6                | 6                | 2.145642                | 0.971093  | -0.077868 |
| 7                | 1                | 2.676808                | 0.652436  | 0.823900  |
| 8                | 1                | 2.645056                | 0.563169  | -0.961816 |
| 9                | 1                | 2.116506                | 2.061846  | -0.131655 |
| 10               | 6                | -2.791652               | 0.840096  | 0.013725  |
| 11               | 1                | -3.264878               | 0.476459  | 0.930307  |
| 12               | 1                | -2.824649               | 1.931285  | -0.033909 |
| 13               | 1                | -3.299237               | 0.398032  | -0.848313 |
| 14               | 1                | -0.353896               | 2.305239  | -0.102748 |
| 15               | 35               | -2.257035               | -2.373868 | 0.178091  |
| 16               | 35               | 1.610456                | -2.239029 | 0.107497  |
| 17               | 53               | -4.318879               | -4.503287 | 0.371660  |

---

**6-I**

---

| Center<br>Number | Atomic<br>Number | Coordinates (Angstroms) |           |           |
|------------------|------------------|-------------------------|-----------|-----------|
|                  |                  | X                       | Y         | Z         |
| 1                | 6                | -0.998197               | -0.892764 | 0.029929  |
| 2                | 6                | 0.374568                | -0.844704 | 0.019410  |
| 3                | 6                | -0.322282               | 1.238548  | -0.040824 |
| 4                | 7                | -1.388191               | 0.436609  | -0.008800 |
| 5                | 7                | 0.776364                | 0.481049  | -0.024584 |
| 6                | 6                | 2.146426                | 0.976014  | -0.052715 |
| 7                | 1                | 2.671896                | 0.639777  | 0.846159  |
| 8                | 1                | 2.653766                | 0.584910  | -0.939829 |
| 9                | 1                | 2.120351                | 2.067889  | -0.085909 |
| 10               | 6                | -2.778227               | 0.884057  | -0.008848 |
| 11               | 1                | -3.264578               | 0.530403  | 0.904795  |
| 12               | 1                | -2.796369               | 1.976046  | -0.056725 |
| 13               | 1                | -3.288775               | 0.451585  | -0.873914 |
| 14               | 1                | -0.335540               | 2.320530  | -0.074495 |
| 15               | 53               | -2.447141               | -2.598898 | 0.100038  |
| 16               | 53               | 1.713766                | -2.416303 | 0.072425  |
| 17               | 53               | -4.415498               | -4.846948 | 0.192035  |

---

## Charge-assisted complexes

### 1-HCl

| Center<br>Number | Atomic<br>Number | Coordinates (Angstroms) |           |           |
|------------------|------------------|-------------------------|-----------|-----------|
|                  |                  | X                       | Y         | Z         |
| 1                | 6                | 3.823566                | 1.433644  | 0.035092  |
| 2                | 6                | 3.966890                | 0.079542  | 0.016082  |
| 3                | 6                | 1.818208                | 0.535629  | 0.121142  |
| 4                | 7                | 2.471890                | 1.700566  | 0.100326  |
| 5                | 1                | 4.561520                | 2.225019  | 0.007061  |
| 6                | 1                | 4.854052                | -0.538729 | -0.029569 |
| 7                | 7                | 2.700948                | -0.466051 | 0.070720  |
| 8                | 6                | 1.841790                | 3.022842  | 0.153798  |
| 9                | 1                | 1.116167                | 3.110988  | -0.659660 |
| 10               | 1                | 1.344829                | 3.150411  | 1.120076  |
| 11               | 1                | 2.627071                | 3.771193  | 0.035218  |
| 12               | 6                | 2.361109                | -1.891443 | 0.069757  |
| 13               | 1                | 3.294370                | -2.456187 | 0.038409  |
| 14               | 1                | 1.808466                | -2.133412 | 0.982056  |
| 15               | 1                | 1.755772                | -2.120707 | -0.812014 |
| 16               | 17               | 0.141335                | 0.360756  | 0.194832  |
| 17               | 17               | -3.136912               | 0.759842  | 0.461853  |
| 18               | 1                | -3.938495               | -0.225004 | 0.224456  |

### 2-HCl

| Center<br>Number | Atomic<br>Number | Coordinates (Angstroms) |   |   |
|------------------|------------------|-------------------------|---|---|
|                  |                  | X                       | Y | Z |

|    |    |           |           |           |
|----|----|-----------|-----------|-----------|
| 1  | 6  | 0.314380  | 1.490572  | -4.267603 |
| 2  | 6  | 0.491796  | 0.145868  | -4.389256 |
| 3  | 6  | -1.083323 | 0.491524  | -2.888011 |
| 4  | 7  | -0.672696 | 1.687431  | -3.325631 |
| 5  | 1  | 0.802737  | 2.317625  | -4.766447 |
| 6  | 1  | 1.163284  | -0.427482 | -5.015207 |
| 7  | 7  | -0.389611 | -0.461706 | -3.520521 |
| 8  | 6  | -1.196065 | 2.979510  | -2.875237 |
| 9  | 1  | -2.265139 | 3.037145  | -3.099922 |
| 10 | 1  | -1.030283 | 3.083727  | -1.799034 |
| 11 | 1  | -0.659343 | 3.763122  | -3.412651 |
| 12 | 6  | -0.549121 | -1.903840 | -3.316925 |
| 13 | 1  | 0.149749  | -2.413458 | -3.982605 |
| 14 | 1  | -0.322451 | -2.151359 | -2.275845 |
| 15 | 1  | -1.575623 | -2.193358 | -3.559761 |
| 16 | 35 | -2.394759 | 0.204916  | -1.623404 |
| 17 | 17 | -4.873363 | -0.422083 | 0.426454  |
| 18 | 1  | -4.433342 | -0.429951 | 1.641359  |

## 2-HBr

| Center<br>Number | Atomic<br>Number | Coordinates (Angstroms) |           |          |
|------------------|------------------|-------------------------|-----------|----------|
|                  |                  | X                       | Y         | Z        |
| 1                | 6                | 3.622279                | 1.867649  | 0.222252 |
| 2                | 6                | 3.714347                | 0.509144  | 0.200397 |
| 3                | 6                | 1.577742                | 1.046452  | 0.232997 |
| 4                | 7                | 2.280760                | 2.184822  | 0.242458 |
| 5                | 1                | 4.390565                | 2.630292  | 0.225244 |
| 6                | 1                | 4.578593                | -0.141998 | 0.181392 |
| 7                | 7                | 2.427962                | 0.013743  | 0.207314 |
| 8                | 6                | 1.709277                | 3.533494  | 0.270180 |



|    |    |           |           |           |
|----|----|-----------|-----------|-----------|
| 9  | 1  | 1.086726  | 3.682680  | -0.616995 |
| 10 | 1  | 1.110105  | 3.655368  | 1.177386  |
| 11 | 1  | 2.535954  | 4.246020  | 0.269966  |
| 12 | 6  | 2.044040  | -1.399755 | 0.190474  |
| 13 | 1  | 2.958928  | -1.993988 | 0.160709  |
| 14 | 1  | 1.476482  | -1.633734 | 1.095858  |
| 15 | 1  | 1.438331  | -1.601647 | -0.697828 |
| 16 | 35 | -0.263154 | 0.925278  | 0.246563  |
| 17 | 1  | -4.164298 | -0.086835 | 0.826523  |
| 18 | 35 | -3.663157 | 1.026542  | 0.085060  |

---

## 2-HI

| Center<br>Number | Atomic<br>Number | Coordinates (Angstroms) |           |           |
|------------------|------------------|-------------------------|-----------|-----------|
|                  |                  | X                       | Y         | Z         |
| 1                | 6                | 3.846403                | 0.942407  | -0.365878 |
| 2                | 6                | 3.888205                | -0.418574 | -0.369589 |
| 3                | 6                | 1.781710                | 0.197152  | -0.169287 |
| 4                | 7                | 2.523104                | 1.308787  | -0.240100 |
| 5                | 1                | 4.638021                | 1.676512  | -0.443000 |
| 6                | 1                | 4.723495                | -1.102286 | -0.448679 |
| 7                | 7                | 2.590124                | -0.866240 | -0.245793 |
| 8                | 6                | 2.004449                | 2.677789  | -0.190051 |
| 9                | 1                | 1.324624                | 2.840877  | -1.031521 |
| 10               | 1                | 1.478233                | 2.831545  | 0.756533  |
| 11               | 1                | 2.854064                | 3.359368  | -0.258802 |
| 12               | 6                | 2.156858                | -2.264918 | -0.206027 |
| 13               | 1                | 3.048025                | -2.892222 | -0.265204 |
| 14               | 1                | 1.629174                | -2.454762 | 0.733211  |
| 15               | 1                | 1.499605                | -2.467050 | -1.056938 |
| 16               | 35               | -0.055676               | 0.143392  | 0.008691  |
| 17               | 53               | -3.640801               | 0.156679  | 0.348065  |

18            1            -3.857965    -1.415534    0.035985

---

### 3-HI

---

| Center<br>Number | Atomic<br>Number | Coordinates (Angstroms) |           |           |
|------------------|------------------|-------------------------|-----------|-----------|
|                  |                  | X                       | Y         | Z         |
| 1                | 6                | -1.046306               | -1.126076 | -0.176051 |
| 2                | 6                | 0.313308                | -1.062333 | -0.146500 |
| 3                | 6                | -0.463860               | 1.007700  | -0.213820 |
| 4                | 7                | -1.511044               | 0.170043  | -0.218147 |
| 5                | 1                | -1.715802               | -1.976353 | -0.170666 |
| 6                | 1                | 1.058985                | -1.846064 | -0.108730 |
| 7                | 7                | 0.656621                | 0.271930  | -0.170567 |
| 8                | 6                | 2.021706                | 0.801062  | -0.154871 |
| 9                | 1                | 2.708740                | -0.045580 | -0.103632 |
| 10               | 1                | 2.203133                | 1.372073  | -1.070376 |
| 11               | 1                | 2.154599                | 1.442151  | 0.721628  |
| 12               | 6                | -2.918947               | 0.569446  | -0.260652 |
| 13               | 1                | -3.155504               | 1.171678  | 0.621477  |
| 14               | 1                | -3.107777               | 1.144788  | -1.171886 |
| 15               | 1                | -3.525384               | -0.338046 | -0.263137 |
| 16               | 53               | -0.557214               | 3.078476  | -0.269221 |
| 17               | 53               | -0.556705               | 6.702756  | -0.442819 |
| 18               | 1                | -1.966431               | 6.940964  | 0.314787  |

---

#### 4-HCl

---

| Center<br>Number | Atomic<br>Number | Coordinates (Angstroms) |           |           |
|------------------|------------------|-------------------------|-----------|-----------|
|                  |                  | X                       | Y         | Z         |
| 1                | 6                | -0.389534               | -1.443433 | -0.061966 |
| 2                | 6                | 0.601823                | -2.368421 | -0.256529 |
| 3                | 6                | -1.286061               | -3.450520 | 0.074504  |
| 4                | 7                | -1.558389               | -2.146747 | 0.142678  |
| 5                | 7                | 0.015717                | -3.614061 | -0.165929 |
| 6                | 6                | 0.715576                | -4.893019 | -0.313282 |
| 7                | 1                | 1.160254                | -4.943619 | -1.311334 |
| 8                | 1                | 1.495121                | -4.962836 | 0.450619  |
| 9                | 1                | -0.013459               | -5.695612 | -0.183540 |
| 10               | 6                | -2.872525               | -1.546061 | 0.386885  |
| 11               | 1                | -3.144847               | -0.926281 | -0.471978 |
| 12               | 1                | -3.597539               | -2.352213 | 0.516527  |
| 13               | 1                | -2.821120               | -0.933039 | 1.291027  |
| 14               | 1                | -2.007720               | -4.249211 | 0.195498  |
| 15               | 17               | -0.324858               | 0.246692  | -0.050008 |
| 16               | 17               | 2.251572                | -2.147600 | -0.557700 |
| 17               | 17               | -0.933321               | 3.529145  | 0.010684  |
| 18               | 1                | 0.054285                | 4.326335  | 0.249916  |

---

## 5-HCl

---

| Center<br>Number | Atomic<br>Number | Coordinates (Angstroms) |           |           |
|------------------|------------------|-------------------------|-----------|-----------|
|                  |                  | X                       | Y         | Z         |
| 1                | 6                | -1.241353               | -1.109248 | 0.094640  |
| 2                | 6                | 0.127466                | -1.182612 | 0.119430  |
| 3                | 6                | -0.438983               | 0.942999  | 0.033852  |
| 4                | 7                | -1.567091               | 0.231418  | 0.040508  |
| 5                | 7                | 0.603294                | 0.112272  | 0.081143  |
| 6                | 6                | 2.014926                | 0.503635  | 0.094757  |
| 7                | 1                | 2.472758                | 0.153080  | 1.024349  |
| 8                | 1                | 2.517163                | 0.051472  | -0.765227 |
| 9                | 1                | 2.067851                | 1.592770  | 0.034058  |
| 10               | 6                | -2.926188               | 0.776030  | -0.010095 |
| 11               | 1                | -3.467866               | 0.470118  | 0.889422  |
| 12               | 1                | -2.855691               | 1.864844  | -0.057887 |
| 13               | 1                | -3.430284               | 0.389827  | -0.900735 |
| 14               | 1                | -0.378262               | 2.023975  | -0.004367 |
| 15               | 35               | -2.500185               | -2.459216 | 0.120445  |
| 16               | 35               | 1.226365                | -2.662546 | 0.176015  |
| 17               | 17               | -4.894974               | -4.732045 | -0.043639 |
| 18               | 1                | -4.712683               | -5.632769 | 0.864243  |

---

## 5-HBr

---

| Center<br>Number | Atomic<br>Number | Coordinates (Angstroms) |   |   |
|------------------|------------------|-------------------------|---|---|
|                  |                  | X                       | Y | Z |

---

|    |    |           |            |           |
|----|----|-----------|------------|-----------|
| 1  | 6  | 0.433901  | -7.061791  | 0.208009  |
| 2  | 6  | 1.382656  | -6.113903  | -0.076099 |
| 3  | 6  | 2.391993  | -8.063930  | 0.120282  |
| 4  | 7  | 1.090618  | -8.270276  | 0.325473  |
| 5  | 7  | 2.596974  | -6.769130  | -0.124725 |
| 6  | 6  | 3.892170  | -6.141903  | -0.399289 |
| 7  | 1  | 3.868273  | -5.696599  | -1.398151 |
| 8  | 1  | 4.077923  | -5.369412  | 0.352115  |
| 9  | 1  | 4.663092  | -6.913766  | -0.346287 |
| 10 | 6  | 0.461751  | -9.558587  | 0.626957  |
| 11 | 1  | -0.274338 | -9.785309  | -0.149607 |
| 12 | 1  | 1.241570  | -10.323262 | 0.643605  |
| 13 | 1  | -0.028431 | -9.496017  | 1.602862  |
| 14 | 1  | 3.160552  | -8.827103  | 0.150266  |
| 15 | 35 | -1.388705 | -6.879513  | 0.421592  |
| 16 | 35 | 1.198751  | -4.297263  | -0.358230 |
| 17 | 1  | -0.424052 | -0.768463  | -0.917749 |
| 18 | 35 | 0.991327  | -0.899093  | -0.790289 |

---

## 5-HI

---

| Center<br>Number | Atomic<br>Number | Coordinates (Angstroms) |           |           |
|------------------|------------------|-------------------------|-----------|-----------|
|                  |                  | X                       | Y         | Z         |
| 1                | 6                | -0.144809               | -0.409636 | 0.138997  |
| 2                | 6                | 1.224998                | -0.422336 | 0.085148  |
| 3                | 6                | 0.556253                | 1.669059  | -0.078557 |
| 4                | 7                | -0.534837               | 0.910817  | 0.034719  |
| 5                | 7                | 1.637145                | 0.888052  | -0.051015 |
| 6                | 6                | 3.026668                | 1.341007  | -0.148930 |
| 7                | 1                | 3.564667                | 1.039363  | 0.754251  |
| 8                | 1                | 3.488612                | 0.886970  | -1.030435 |
| 9                | 1                | 3.024804                | 2.429202  | -0.241509 |

|    |    |           |           |           |
|----|----|-----------|-----------|-----------|
| 10 | 6  | -1.918287 | 1.392492  | 0.047765  |
| 11 | 1  | -2.385734 | 1.106681  | 0.994495  |
| 12 | 1  | -1.902343 | 2.479738  | -0.053785 |
| 13 | 1  | -2.459798 | 0.941079  | -0.788450 |
| 14 | 1  | 0.564325  | 2.747817  | -0.177121 |
| 15 | 35 | -1.337747 | -1.809756 | 0.323560  |
| 16 | 35 | 2.393341  | -1.846078 | 0.170283  |
| 17 | 53 | -3.511911 | -4.660251 | 0.886076  |
| 18 | 1  | -4.387793 | -4.646775 | -0.475326 |

---

## 6-HI

---

| Center<br>Number | Atomic<br>Number | Coordinates (Angstroms) |           |           |
|------------------|------------------|-------------------------|-----------|-----------|
|                  |                  | X                       | Y         | Z         |
| 1                | 6                | 1.546781                | 2.724801  | -0.122011 |
| 2                | 6                | 2.919902                | 2.740068  | -0.076165 |
| 3                | 6                | 2.214509                | 4.827855  | -0.005280 |
| 4                | 7                | 1.137555                | 4.045338  | -0.076680 |
| 5                | 7                | 3.308121                | 4.065397  | -0.002560 |
| 6                | 6                | 4.683736                | 4.559597  | 0.076541  |
| 7                | 1                | 5.156017                | 4.156416  | 0.977171  |
| 8                | 1                | 5.233576                | 4.235795  | -0.811752 |
| 9                | 1                | 4.653618                | 5.650498  | 0.123621  |
| 10               | 6                | -0.248348               | 4.516159  | -0.106481 |
| 11               | 1                | -0.786945               | 4.094573  | 0.747147  |
| 12               | 1                | -0.241993               | 5.606852  | -0.047448 |
| 13               | 1                | -0.715708               | 4.191144  | -1.040531 |
| 14               | 1                | 2.203647                | 5.910016  | 0.043170  |
| 15               | 53               | 0.237170                | 1.121327  | -0.226524 |
| 16               | 53               | 4.250017                | 1.166502  | -0.113436 |
| 17               | 53               | -2.124331               | -1.673160 | -0.347557 |
| 18               | 1                | -1.054137               | -2.730098 | 0.256706  |

7-Cl<sup>-</sup>

| Center<br>Number | Atomic<br>Number | Coordinates (Angstroms) |           |           |
|------------------|------------------|-------------------------|-----------|-----------|
|                  |                  | X                       | Y         | Z         |
| 1                | 6                | 1.829115                | 0.988114  | 0.559483  |
| 2                | 6                | 2.639432                | -0.121031 | 0.510343  |
| 3                | 6                | 0.743690                | -0.757844 | -0.166455 |
| 4                | 7                | 0.598576                | 0.559085  | 0.116362  |
| 5                | 1                | 1.964678                | 2.030754  | 0.850727  |
| 6                | 1                | 3.686395                | -0.194843 | 0.779815  |
| 7                | 7                | 1.944383                | -1.222597 | 0.049976  |
| 8                | 6                | -0.598384               | 1.378333  | -0.012090 |
| 9                | 1                | -0.931811               | 1.379970  | -1.056097 |
| 10               | 1                | -1.393201               | 0.970009  | 0.622461  |
| 11               | 1                | -0.335163               | 2.396336  | 0.309013  |
| 12               | 17               | -0.593119               | -1.687411 | -0.760303 |
| 13               | 17               | 0.930775                | 4.307101  | 1.115926  |

**8-Cl<sup>-</sup>**

---

| Center<br>Number | Atomic<br>Number | Coordinates (Angstroms) |           |           |
|------------------|------------------|-------------------------|-----------|-----------|
|                  |                  | X                       | Y         | Z         |
| 1                | 6                | 2.456839                | 0.739125  | -0.117190 |
| 2                | 6                | 2.491677                | -0.632747 | -0.124582 |
| 3                | 6                | 0.428532                | -0.101504 | 0.034779  |
| 4                | 7                | 1.124319                | 1.071754  | -0.015931 |
| 5                | 1                | 3.231730                | 1.493413  | -0.176393 |
| 6                | 1                | 3.361116                | -1.277660 | -0.192345 |
| 7                | 7                | 1.221695                | -1.149867 | -0.029456 |
| 8                | 6                | 0.558350                | 2.405414  | 0.047502  |
| 9                | 1                | -0.183278               | 2.537703  | -0.746907 |
| 10               | 1                | 0.060701                | 2.561192  | 1.011006  |
| 11               | 1                | 1.369938                | 3.128512  | -0.074318 |
| 12               | 35               | -1.447165               | -0.069843 | 0.179976  |
| 13               | 17               | -4.461054               | 0.386783  | 0.409766  |

---



**8-Br<sup>-</sup>**

---

| Center<br>Number | Atomic<br>Number | Coordinates (Angstroms) |           |           |
|------------------|------------------|-------------------------|-----------|-----------|
|                  |                  | X                       | Y         | Z         |
| 1                | 6                | 2.383699                | 0.729558  | -0.100783 |
| 2                | 6                | 2.422953                | -0.642216 | -0.113214 |
| 3                | 6                | 0.358780                | -0.117241 | 0.023444  |
| 4                | 7                | 1.049458                | 1.058688  | -0.014182 |
| 5                | 1                | 3.157078                | 1.486227  | -0.147370 |
| 6                | 1                | 3.294841                | -1.284375 | -0.173268 |
| 7                | 7                | 1.153372                | -1.163467 | -0.035420 |
| 8                | 6                | 0.478445                | 2.390696  | 0.050022  |
| 9                | 1                | -0.261571               | 2.521402  | -0.746012 |
| 10               | 1                | -0.021429               | 2.543639  | 1.012793  |
| 11               | 1                | 1.287918                | 3.116377  | -0.069230 |
| 12               | 35               | -1.516093               | -0.091847 | 0.145266  |
| 13               | 35               | -4.724603               | 0.498888  | 0.343849  |

---

**8-I<sup>-</sup>**

---

| Center<br>Number | Atomic<br>Number | Coordinates (Angstroms) |          |           |
|------------------|------------------|-------------------------|----------|-----------|
|                  |                  | X                       | Y        | Z         |
| 1                | 6                | 2.457317                | 0.752183 | -0.117746 |

---

|    |    |           |           |           |
|----|----|-----------|-----------|-----------|
| 2  | 6  | 2.531346  | -0.618366 | -0.126789 |
| 3  | 6  | 0.459013  | -0.144509 | 0.033924  |
| 4  | 7  | 1.116907  | 1.048694  | -0.015306 |
| 5  | 1  | 3.210718  | 1.527857  | -0.176155 |
| 6  | 1  | 3.418135  | -1.238722 | -0.195477 |
| 7  | 7  | 1.276202  | -1.171262 | -0.031541 |
| 8  | 6  | 0.512426  | 2.366480  | 0.051513  |
| 9  | 1  | -0.233767 | 2.479529  | -0.741467 |
| 10 | 1  | 0.013633  | 2.506640  | 1.016648  |
| 11 | 1  | 1.303326  | 3.111565  | -0.071015 |
| 12 | 35 | -1.412662 | -0.163169 | 0.175442  |
| 13 | 53 | -4.855061 | 0.602315  | 0.402020  |

---

9-I-

---

| Center<br>Number | Atomic<br>Number | Coordinates (Angstroms) |           |           |
|------------------|------------------|-------------------------|-----------|-----------|
|                  |                  | X                       | Y         | Z         |
| 1                | 6                | 2.446908                | 0.744469  | -0.110152 |
| 2                | 6                | 2.485985                | -0.627294 | -0.117701 |
| 3                | 6                | 0.413832                | -0.100548 | 0.029491  |
| 4                | 7                | 1.113273                | 1.073644  | -0.017244 |
| 5                | 1                | 3.220429                | 1.500731  | -0.164561 |
| 6                | 1                | 3.357651                | -1.269976 | -0.180503 |
| 7                | 7                | 1.216365                | -1.144993 | -0.030754 |
| 8                | 6                | 0.560655                | 2.412788  | 0.045025  |
| 9                | 1                | -0.182985               | 2.552327  | -0.746541 |
| 10               | 1                | 0.072556                | 2.580707  | 1.011829  |

|    |    |           |           |           |
|----|----|-----------|-----------|-----------|
| 11 | 1  | 1.378006  | 3.128209  | -0.085080 |
| 12 | 53 | -1.697657 | -0.108454 | 0.179789  |
| 13 | 53 | -5.128966 | 0.130007  | 0.434289  |

---

### 10-Cl<sup>-</sup>

---

| Center<br>Number | Atomic<br>Number | Coordinates (Angstroms) |           |           |
|------------------|------------------|-------------------------|-----------|-----------|
|                  |                  | X                       | Y         | Z         |
| 1                | 6                | 2.519530                | 0.034192  | -0.159054 |
| 2                | 6                | 1.595115                | -0.953968 | -0.383437 |
| 3                | 7                | 1.807862                | 1.204580  | -0.105991 |
| 4                | 7                | 0.346890                | -0.435369 | -0.470076 |
| 5                | 6                | 2.338362                | 2.543061  | 0.111867  |
| 6                | 1                | 1.487420                | 3.240764  | 0.087683  |
| 7                | 1                | 2.842051                | 2.581289  | 1.084682  |
| 8                | 1                | 3.057081                | 2.782276  | -0.680303 |
| 9                | 6                | 0.504130                | 0.870859  | -0.298778 |
| 10               | 1                | -0.266120               | 1.644516  | -0.300346 |
| 11               | 17               | 4.224411                | -0.027476 | 0.032961  |
| 12               | 17               | 1.924337                | -2.645004 | -0.540150 |
| 13               | 17               | -0.707182               | 4.116979  | -0.090459 |

---

**11-Cl<sup>-</sup>**

---

| Center<br>Number | Atomic<br>Number | Coordinates (Angstroms) |           |           |
|------------------|------------------|-------------------------|-----------|-----------|
|                  |                  | X                       | Y         | Z         |
| 1                | 6                | 2.292191                | 0.576913  | 0.007638  |
| 2                | 6                | 2.164785                | -0.789273 | -0.122232 |
| 3                | 7                | 0.996170                | 1.039764  | -0.026969 |
| 4                | 7                | 0.861886                | -1.170600 | -0.232121 |
| 5                | 6                | 0.596694                | 2.430187  | 0.071053  |
| 6                | 1                | -0.495049               | 2.475973  | 0.014294  |
| 7                | 1                | 0.944176                | 2.853140  | 1.019553  |
| 8                | 1                | 1.041525                | 3.006143  | -0.747455 |
| 9                | 35               | 3.739909                | 1.757442  | 0.199252  |
| 10               | 35               | 3.574657                | -2.025355 | -0.156517 |
| 11               | 6                | 0.184376                | -0.041782 | -0.170565 |
| 12               | 1                | -0.894805               | 0.051451  | -0.224930 |
| 13               | 17               | 5.792756                | 3.903471  | 0.513929  |

---

**11-Br<sup>-</sup>**

---

| Center<br>Number | Atomic<br>Number | Coordinates (Angstroms) |           |           |
|------------------|------------------|-------------------------|-----------|-----------|
|                  |                  | X                       | Y         | Z         |
| 1                | 6                | 1.433604                | -3.570420 | 0.080661  |
| 2                | 6                | 2.420471                | -2.615580 | 0.196029  |
| 3                | 7                | 0.266212                | -2.845320 | 0.007298  |
| 4                | 7                | 1.906350                | -1.354810 | 0.196146  |
| 5                | 6                | -1.065905               | -3.401723 | -0.131745 |
| 6                | 1                | -1.778138               | -2.572089 | -0.170321 |
| 7                | 1                | -1.129050               | -3.996057 | -1.049335 |
| 8                | 1                | -1.291843               | -4.052661 | 0.719308  |
| 9                | 35               | 1.417930                | -5.442854 | 0.012703  |
| 10               | 35               | 4.261632                | -2.941583 | 0.328628  |
| 11               | 6                | 0.605498                | -1.530448 | 0.080770  |
| 12               | 1                | -0.137734               | -0.741509 | 0.042878  |
| 13               | 35               | 0.887683                | -8.595118 | -0.157279 |

---

**11-I<sup>-</sup>**

| Center<br>Number | Atomic<br>Number | Coordinates (Angstroms) |           |           |
|------------------|------------------|-------------------------|-----------|-----------|
|                  |                  | X                       | Y         | Z         |
| 1                | 6                | 2.266133                | 0.524323  | 0.008590  |
| 2                | 6                | 2.113066                | -0.839544 | -0.108275 |
| 3                | 7                | 0.983450                | 1.019683  | -0.034103 |
| 4                | 7                | 0.802233                | -1.189719 | -0.218637 |
| 5                | 6                | 0.615206                | 2.420632  | 0.051372  |
| 6                | 1                | -0.474722               | 2.489573  | -0.011582 |
| 7                | 1                | 0.966258                | 2.842693  | 0.998879  |
| 8                | 1                | 1.076456                | 2.979849  | -0.769415 |
| 9                | 35               | 3.734444                | 1.668909  | 0.191596  |
| 10               | 35               | 3.494452                | -2.105733 | -0.125545 |
| 11               | 6                | 0.149832                | -0.045429 | -0.169910 |
| 12               | 1                | -0.926784               | 0.070774  | -0.228519 |
| 13               | 53               | 5.964482                | 4.290435  | 0.564516  |

**12-I<sup>-</sup>**

| Center<br>Number | Atomic<br>Number | Coordinates (Angstroms) |           |           |
|------------------|------------------|-------------------------|-----------|-----------|
|                  |                  | X                       | Y         | Z         |
| 1                | 6                | 2.339371                | 0.580991  | -0.086443 |
| 2                | 6                | 2.257233                | -0.788131 | -0.246024 |

|    |    |           |           |           |
|----|----|-----------|-----------|-----------|
| 3  | 7  | 1.027266  | 0.997870  | -0.165265 |
| 4  | 7  | 0.971233  | -1.211295 | -0.415598 |
| 5  | 6  | 0.558735  | 2.365924  | -0.062173 |
| 6  | 1  | -0.532056 | 2.361484  | -0.151719 |
| 7  | 1  | 0.853158  | 2.791977  | 0.902969  |
| 8  | 1  | 0.996441  | 2.975772  | -0.859997 |
| 9  | 53 | 3.935871  | 1.943841  | 0.213126  |
| 10 | 53 | 3.859624  | -2.120380 | -0.239446 |
| 11 | 6  | 0.256638  | -0.105742 | -0.361532 |
| 12 | 1  | -0.822419 | -0.045305 | -0.456895 |
| 13 | 53 | 6.316435  | 4.270377  | 0.685273  |

---

## Neutral complexes

### 7-HCl

---

| Center<br>Number | Atomic<br>Number | Coordinates (Angstroms) |           |           |
|------------------|------------------|-------------------------|-----------|-----------|
|                  |                  | X                       | Y         | Z         |
| 1                | 6                | 5.560195                | 1.718064  | -0.349854 |
| 2                | 6                | 5.192704                | 0.404085  | -0.207177 |
| 3                | 6                | 3.394474                | 1.521376  | -0.200229 |
| 4                | 7                | 4.385543                | 2.439002  | -0.344852 |
| 5                | 1                | 6.523195                | 2.201824  | -0.453994 |
| 6                | 1                | 5.831910                | -0.469774 | -0.168568 |
| 7                | 7                | 3.824335                | 0.292687  | -0.113817 |
| 8                | 6                | 4.233073                | 3.877505  | -0.460248 |
| 9                | 1                | 3.611379                | 4.123274  | -1.327363 |

---

|    |    |           |          |           |
|----|----|-----------|----------|-----------|
| 10 | 1  | 3.768090  | 4.283762 | 0.444412  |
| 11 | 1  | 5.225770  | 4.315477 | -0.587696 |
| 12 | 17 | 1.746111  | 2.015097 | -0.151966 |
| 13 | 17 | -1.423112 | 0.386186 | -0.198244 |
| 14 | 1  | -2.695805 | 0.177627 | -0.199283 |

---

## 8-HCl

---

| Center<br>Number | Atomic<br>Number | Coordinates (Angstroms) |          |           |
|------------------|------------------|-------------------------|----------|-----------|
|                  |                  | X                       | Y        | Z         |
| 1                | 6                | 3.346182                | 6.504918 | 0.520716  |
| 2                | 6                | 4.163661                | 5.404588 | 0.579102  |
| 3                | 6                | 2.178414                | 4.662257 | 0.539985  |
| 4                | 7                | 2.058686                | 6.016098 | 0.496056  |
| 5                | 1                | 3.549967                | 7.567885 | 0.495945  |
| 6                | 1                | 5.246101                | 5.374988 | 0.613701  |
| 7                | 7                | 3.416449                | 4.249760 | 0.590659  |
| 8                | 6                | 0.831059                | 6.787774 | 0.433503  |
| 9                | 1                | 0.278304                | 6.548842 | -0.481360 |
| 10               | 1                | 0.202169                | 6.566717 | 1.302269  |
| 11               | 1                | 1.095592                | 7.847879 | 0.434109  |
| 12               | 35               | 0.662880                | 3.562569 | 0.527669  |
| 13               | 17               | -2.563398               | 2.143911 | 0.398835  |
| 14               | 1                | -2.748310               | 0.866953 | 0.400177  |

---



### 8-HBr

| Center<br>Number | Atomic<br>Number | Coordinates (Angstroms) |           |           |
|------------------|------------------|-------------------------|-----------|-----------|
|                  |                  | X                       | Y         | Z         |
| 1                | 6                | -3.995820               | 0.349507  | -0.038250 |
| 2                | 6                | -3.956140               | -1.021882 | -0.039917 |
| 3                | 6                | -1.937847               | -0.374286 | 0.002333  |
| 4                | 7                | -2.682187               | 0.763422  | -0.010659 |
| 5                | 1                | -4.813968               | 1.058419  | -0.054806 |
| 6                | 1                | -4.787229               | -1.716841 | -0.057603 |
| 7                | 7                | -2.654485               | -1.466052 | -0.014808 |
| 8                | 6                | -2.195214               | 2.130465  | 0.004441  |
| 9                | 1                | -1.613057               | 2.314284  | 0.913643  |
| 10               | 1                | -1.564162               | 2.316858  | -0.870861 |
| 11               | 1                | -3.058347               | 2.799911  | -0.018324 |
| 12               | 35               | -0.067452               | -0.299627 | 0.040874  |
| 13               | 1                | 3.972203                | -1.260886 | -0.075511 |
| 14               | 35               | 3.545492                | 0.096879  | -0.018871 |

## 8-HI

---

| Center<br>Number | Atomic<br>Number | Coordinates (Angstroms) |           |           |
|------------------|------------------|-------------------------|-----------|-----------|
|                  |                  | X                       | Y         | Z         |
| 1                | 6                | 2.572409                | 0.852461  | -0.158585 |
| 2                | 6                | 2.646418                | -0.517630 | -0.154614 |
| 3                | 6                | 0.591166                | -0.038142 | 0.044850  |
| 4                | 7                | 1.235271                | 1.156935  | -0.029818 |
| 5                | 1                | 3.325591                | 1.625849  | -0.241479 |
| 6                | 1                | 3.528754                | -1.141333 | -0.235306 |
| 7                | 7                | 1.392020                | -1.067295 | -0.026155 |
| 8                | 6                | 0.639970                | 2.478970  | 0.030894  |
| 9                | 1                | -0.100171               | 2.596322  | -0.767342 |
| 10               | 1                | 0.151853                | 2.630450  | 0.999641  |
| 11               | 1                | 1.435113                | 3.217191  | -0.096991 |
| 12               | 35               | -1.272095               | -0.116969 | 0.227924  |
| 13               | 53               | -5.059884               | -0.098573 | 0.493873  |
| 14               | 1                | -5.303718               | -1.696097 | 0.491117  |

---

## 9-HI

---

| Center<br>Number | Atomic<br>Number | Coordinates (Angstroms) |          |           |
|------------------|------------------|-------------------------|----------|-----------|
|                  |                  | X                       | Y        | Z         |
| 1                | 6                | 5.682061                | 3.187928 | -0.200127 |
| 2                | 6                | 5.775766                | 1.819057 | -0.175703 |
| 3                | 6                | 3.707981                | 2.273649 | 0.012104  |
| 4                | 7                | 4.341348                | 3.476204 | -0.079531 |
| 5                | 1                | 6.425221                | 3.969938 | -0.292733 |
| 6                | 1                | 6.666897                | 1.206377 | -0.245087 |
| 7                | 7                | 4.528940                | 1.256076 | -0.042042 |
| 8                | 6                | 3.740987                | 4.796691 | -0.035038 |
| 9                | 1                | 2.984384                | 4.894526 | -0.820350 |
| 10               | 1                | 3.272407                | 4.970328 | 0.940042  |
| 11               | 1                | 4.529822                | 5.535462 | -0.196315 |
| 12               | 53               | 1.640803                | 2.128185 | 0.218595  |
| 13               | 53               | -2.191924               | 2.629547 | 0.757040  |
| 14               | 1                | -3.066668               | 1.268513 | 0.753756  |

---

## 10-HCl

---

| Center<br>Number | Atomic<br>Number | Coordinates (Angstroms) |           |           |
|------------------|------------------|-------------------------|-----------|-----------|
|                  |                  | X                       | Y         | Z         |
| 1                | 6                | 2.437158                | -3.963406 | -0.008725 |
| 2                | 6                | 3.312113                | -2.936128 | -0.265617 |
| 3                | 7                | 3.181100                | -5.114784 | -0.084959 |

---

|    |    |           |           |           |
|----|----|-----------|-----------|-----------|
| 4  | 7  | 4.561108  | -3.416690 | -0.496027 |
| 5  | 6  | 2.693770  | -6.467351 | 0.106894  |
| 6  | 1  | 3.541058  | -7.150067 | 0.002547  |
| 7  | 1  | 2.259016  | -6.571852 | 1.106359  |
| 8  | 1  | 1.934760  | -6.705196 | -0.646031 |
| 9  | 6  | 4.449796  | -4.723978 | -0.381275 |
| 10 | 1  | 5.254504  | -5.440207 | -0.502803 |
| 11 | 17 | 0.765422  | -3.972614 | 0.346395  |
| 12 | 17 | 2.931914  | -1.261248 | -0.296443 |
| 13 | 17 | -2.394467 | -2.541644 | 0.903098  |
| 14 | 1  | -3.644075 | -2.790225 | 1.104440  |

---

## 11-HCl

---

| Center<br>Number | Atomic<br>Number | Coordinates (Angstroms) |           |           |
|------------------|------------------|-------------------------|-----------|-----------|
|                  |                  | X                       | Y         | Z         |
| 1                | 6                | 1.017166                | -1.301949 | -0.398906 |
| 2                | 6                | 1.085470                | -2.669785 | -0.521013 |
| 3                | 7                | -0.318914               | -0.989873 | -0.475585 |
| 4                | 7                | -0.155701               | -3.201964 | -0.668479 |
| 5                | 6                | -0.905449               | 0.334645  | -0.399720 |
| 6                | 1                | -1.988618               | 0.230890  | -0.506124 |
| 7                | 1                | -0.673397               | 0.795485  | 0.566376  |
| 8                | 1                | -0.516044               | 0.965861  | -1.205580 |
| 9                | 35               | 2.339719                | -0.015870 | -0.170718 |
| 10               | 35               | 2.637497                | -3.709891 | -0.500396 |
| 11               | 6                | -0.974028               | -2.170485 | -0.637129 |
| 12               | 1                | -2.053640               | -2.218516 | -0.726482 |

|    |    |          |          |          |
|----|----|----------|----------|----------|
| 13 | 17 | 5.358271 | 1.701636 | 0.301145 |
| 14 | 1  | 5.556786 | 2.976343 | 0.293180 |

---

### 11-HBr

---

| Center<br>Number | Atomic<br>Number | Coordinates (Angstroms) |           |           |
|------------------|------------------|-------------------------|-----------|-----------|
|                  |                  | X                       | Y         | Z         |
| 1                | 6                | -0.788369               | 0.834452  | -0.056250 |
| 2                | 6                | -0.834251               | -0.539700 | -0.038316 |
| 3                | 7                | -2.096587               | 1.246804  | -0.138701 |
| 4                | 7                | -2.117839               | -0.979522 | -0.105058 |
| 5                | 6                | -2.571312               | 2.616239  | -0.197711 |
| 6                | 1                | -3.661772               | 2.592754  | -0.271477 |
| 7                | 1                | -2.275467               | 3.158368  | 0.706600  |
| 8                | 1                | -2.153871               | 3.121010  | -1.075541 |
| 9                | 35               | 0.641570                | 2.020418  | 0.004993  |
| 10               | 35               | 0.631439                | -1.694475 | 0.051167  |
| 11               | 6                | -2.849213               | 0.114281  | -0.164404 |
| 12               | 1                | -3.931226               | 0.147387  | -0.227467 |
| 13               | 1                | 3.139793                | 5.204807  | 0.890722  |
| 14               | 35               | 3.499324                | 4.232797  | -0.089826 |

---

## 11-HI

---

| Center<br>Number | Atomic<br>Number | Coordinates (Angstroms) |           |           |
|------------------|------------------|-------------------------|-----------|-----------|
|                  |                  | X                       | Y         | Z         |
| 1                | 6                | 0.872766                | -0.426514 | -0.916844 |
| 2                | 6                | 1.665437                | -1.539421 | -1.069261 |
| 3                | 7                | -0.421479               | -0.878039 | -1.008663 |
| 4                | 7                | 0.904654                | -2.650333 | -1.249812 |
| 5                | 6                | -1.627877               | -0.077150 | -0.918940 |
| 6                | 1                | -2.485604               | -0.746502 | -1.026048 |
| 7                | 1                | -1.674352               | 0.427146  | 0.052055  |
| 8                | 1                | -1.643588               | 0.671679  | -1.718111 |
| 9                | 35               | 1.297282                | 1.361800  | -0.636900 |
| 10               | 35               | 3.532461                | -1.581272 | -1.043071 |
| 11               | 6                | -0.339725               | -2.220584 | -1.208815 |
| 12               | 1                | -1.224661               | -2.838222 | -1.316254 |
| 13               | 53               | 3.409573                | 4.443400  | -0.236405 |
| 14               | 1                | 2.837723                | 5.949547  | -0.099576 |

---

## 12-HI

---

| Center<br>Number | Atomic<br>Number | Coordinates (Angstroms) |           |           |
|------------------|------------------|-------------------------|-----------|-----------|
|                  |                  | X                       | Y         | Z         |
| 1                | 6                | -1.816752               | 1.686712  | -0.095420 |
| 2                | 6                | -0.933052               | 2.742879  | -0.033619 |
| 3                | 7                | -3.061684               | 2.260022  | -0.221564 |
| 4                | 7                | -1.593564               | 3.929751  | -0.116575 |
| 5                | 6                | -4.333878               | 1.570983  | -0.329755 |
| 6                | 1                | -5.121702               | 2.324933  | -0.409918 |
| 7                | 1                | -4.344001               | 0.934335  | -1.220874 |
| 8                | 1                | -4.505135               | 0.953659  | 0.558647  |
| 9                | 53               | -1.509001               | -0.358958 | -0.027446 |
| 10               | 53               | 1.131989                | 2.631048  | 0.157508  |
| 11               | 6                | -2.864954               | 3.605045  | -0.228507 |
| 12               | 1                | -3.689081               | 4.304459  | -0.317490 |
| 13               | 53               | 0.067435                | -3.887858 | 0.258473  |
| 14               | 1                | -0.883180               | -5.121666 | -0.175465 |

---
